# Supplementary material for: Endoplasmic reticulum stress activates human IRE1α through reversible assembly of inactive dimers into small oligomers
Source: eLife. 2022 Jun 22;11:e74342. doi: 10.7554/eLife.74342 (PMC9217129; doi:10.7554/eLife.74342)
Supplement: Figure 2—figure supplement 1—source data 1. [file elife-74342-fig2-figsupp1-data1.xlsx]

## Sheet: Sheet1
Permutation test, 10000 iterations
	HaloTag-2x-tandem	HaloTag-GST	HaloTag_4x
HaloTag-1x	0	0	0
HaloTag-2x-tandem		0.58216	0
HaloTag-GST			0
Two-tailed t-test
	HaloTag-2x-tandem	HaloTag-GST	HaloTag_4x
HaloTag-1x	3.41798e-13	8.44804e-06	1.75281e-11
HaloTag-2x-tandem		0.58426	1.06716e-09
HaloTag-GST			8.67627e-09
