# Supplementary material for: Endoplasmic reticulum stress activates human IRE1α through reversible assembly of inactive dimers into small oligomers
Source: eLife. 2022 Jun 22;11:e74342. doi: 10.7554/eLife.74342 (PMC9217129; doi:10.7554/eLife.74342)
Supplement: Figure 2—source data 1. [file elife-74342-fig2-data1.xlsx]

## Sheet: Sheet1
Permutation test, 10000 iterations
	HaloTag_2x_200828	HaloTag_1x_201213	HaloTag_2x_201213	HaloTag_1x_201218	HaloTag_2x_201218	HaloTag_1x_201223	HaloTag_2x_201223	HaloTag_1x_210106	HaloTag_2x_210106	HaloTag_1x_210107	HaloTag_2x_210107	HaloTag_1x_210113	HaloTag_2x_210113	HaloTag_1x_210127	HaloTag_2x_210127	HaloTag_1x_210203	HaloTag_2x_210203	HaloTag_1x_210210	HaloTag_2x_210210
HaloTag_1x_200828	2.04785e-06	0.01927	0	0.7451	1e-05	0.32812	0.00228	0.57253	0.00052	0.50858	5e-05	0.86444	0.00102	0.13435	5e-05	0.00358	0.00115	0.43648	0
HaloTag_2x_200828		0	0.50008	3e-05	0.54555	0	0.09372	1e-05	0.6891	0	0.29667	1e-05	0.19288	5e-05	0.68138	0	0.1289	0	0.01657
HaloTag_1x_201213			0	0.13989	0	0.11376	6e-05	0.11261	2e-05	0.18121	0	0.05961	2e-05	0.65954	0	0.91645	0	0.17653	0
HaloTag_2x_201213				0.00017	0.94023	1e-05	0.32726	3e-05	0.95566	5e-05	0.75474	1e-05	0.50644	4e-05	0.82666	0	0.3746	1e-05	0.21543
HaloTag_1x_201218					0.00011	0.75114	0.00532	0.91829	0.00336	0.82318	0.00026	0.87236	0.00225	0.38647	0.00018	0.11167	0.00264	0.77755	6e-05
HaloTag_2x_201218						2e-05	0.30301	0	0.99803	6e-05	0.69762	2e-05	0.47301	7e-05	0.88065	0	0.35174	0	0.17108
HaloTag_1x_201223							0.00043	0.81223	0.00017	0.96019	0	0.56151	0.00011	0.40559	0	0.06836	6e-05	0.9918	0
HaloTag_2x_201223								0.0019	0.42132	0.00204	0.42837	0.00225	0.76512	0.0014	0.22955	1e-05	0.94844	0.00102	0.85732
HaloTag_1x_210106									0.00078	0.88516	3e-05	0.75381	0.00076	0.3652	1e-05	0.07847	0.00058	0.8325	0
HaloTag_2x_210106										0.001	0.76674	0.00087	0.56711	0.0008	0.91345	2e-05	0.44356	0.00056	0.36547
HaloTag_1x_210107											7e-05	0.66095	0.00056	0.47019	2e-05	0.14831	0.00074	0.95699	0
HaloTag_2x_210107												0.0001	0.6537	4e-05	0.57807	0	0.47774	3e-05	0.36306
HaloTag_1x_210113													0.0009	0.24295	2e-05	0.03845	0.00089	0.60415	1e-05
HaloTag_2x_210113														0.00051	0.37845	0	0.81759	0.00037	0.81752
HaloTag_1x_210127															8e-05	0.68071	0.00047	0.47117	2e-05
HaloTag_2x_210127																0	0.25951	2e-05	0.1385
HaloTag_1x_210203																	0	0.14401	0
HaloTag_2x_210203																		0.00034	0.93804
HaloTag_1x_210210																			1e-05
Two-tailed t-test
	HaloTag_2x_200828	HaloTag_1x_201213	HaloTag_2x_201213	HaloTag_1x_201218	HaloTag_2x_201218	HaloTag_1x_201223	HaloTag_2x_201223	HaloTag_1x_210106	HaloTag_2x_210106	HaloTag_1x_210107	HaloTag_2x_210107	HaloTag_1x_210113	HaloTag_2x_210113	HaloTag_1x_210127	HaloTag_2x_210127	HaloTag_1x_210203	HaloTag_2x_210203	HaloTag_1x_210210	HaloTag_2x_210210
HaloTag_1x_200828	2.04785e-06	0.00896155	0.000210752	0.7429	0.000237113	0.291382	0.00299228	0.562933	0.00926751	0.490636	1.87669e-05	0.853531	0.00123481	0.145163	5.64241e-05	0.00187253	0.00148448	0.410978	1.1999e-07
HaloTag_2x_200828		2.65984e-08	0.505899	8.87367e-06	0.555267	3.15286e-07	0.0908095	7.30405e-07	0.703697	1.092e-06	0.272415	1.13421e-06	0.171621	8.3711e-07	0.673301	9.31578e-08	0.0986796	4.6098e-07	0.0244936
HaloTag_1x_201213			1.15399e-05	0.169374	1.39458e-05	0.109268	0.000190838	0.116083	0.00197684	0.193082	3.71239e-07	0.0621402	7.18035e-05	0.67534	2.30118e-06	0.914041	6.77347e-05	0.182024	2.45582e-09
HaloTag_2x_201213				0.000234034	0.941372	7.14956e-05	0.322181	9.74534e-05	0.957053	9.1178e-05	0.758111	0.000151564	0.496168	3.55072e-05	0.825737	1.96628e-05	0.351333	7.02403e-05	0.26187
HaloTag_1x_201218					0.000210192	0.768598	0.00404987	0.920544	0.00772332	0.827074	0.00011646	0.873015	0.00179212	0.38825	9.30197e-05	0.163736	0.00268183	0.783567	0.000224312
HaloTag_2x_201218						7.97199e-05	0.287037	9.66964e-05	0.998117	8.73149e-05	0.696048	0.000145722	0.450473	3.47566e-05	0.882096	2.60724e-05	0.313555	7.00171e-05	0.222386
HaloTag_1x_201223							0.00119575	0.815322	0.00544016	0.959867	4.83968e-06	0.560282	0.000475628	0.431979	1.75047e-05	0.0756553	0.000547581	0.991872	5.32355e-08
HaloTag_2x_201223								0.00195262	0.441754	0.00184407	0.435582	0.00313445	0.762133	0.000645064	0.230988	0.000229227	0.946642	0.00144512	0.865847
HaloTag_1x_210106									0.00644383	0.884515	1.53308e-05	0.756662	0.000794802	0.373454	2.83794e-05	0.098225	0.00105912	0.833358	4.9345e-06
HaloTag_2x_210106										0.00575992	0.791715	0.00834311	0.5857	0.00284433	0.919447	0.00221004	0.469394	0.00540843	0.450082
HaloTag_1x_210107											2.05845e-05	0.665731	0.000760798	0.472385	2.87782e-05	0.180677	0.00104905	0.957917	1.59956e-05
HaloTag_2x_210107												2.85905e-05	0.657818	9.38797e-06	0.583777	5.19584e-07	0.474899	1.01458e-05	0.367572
HaloTag_1x_210113													0.00129239	0.252804	4.62883e-05	0.048911	0.00180556	0.608024	9.51898e-06
HaloTag_2x_210113														0.000266671	0.373447	8.79482e-05	0.811611	0.000582238	0.824778
HaloTag_1x_210127															1.15504e-05	0.70651	0.000349442	0.482899	1.56569e-05
HaloTag_2x_210127																3.818e-06	0.252911	1.99172e-05	0.161535
HaloTag_1x_210203																	7.44252e-05	0.163865	2.89748e-10
HaloTag_2x_210203																		0.000762624	0.932584
HaloTag_1x_210210																			2.98866e-06
