# Supplementary material for: Endoplasmic reticulum stress activates human IRE1α through reversible assembly of inactive dimers into small oligomers
Source: eLife. 2022 Jun 22;11:e74342. doi: 10.7554/eLife.74342 (PMC9217129; doi:10.7554/eLife.74342)
Supplement: Figure 3—figure supplement 1—source data 1. [file elife-74342-fig3-figsupp1-data1.xlsx]

## Sheet: Sheet1
Permutation test, 10000 iterations
	HaloTag_2x	HaloTag_1x_4hTm	HaloTag_2x_4hTm
HaloTag_1x	0	0.45841	0
HaloTag_2x		1e-05	0.13231
HaloTag_1x_4hTm			0.00205
Two-tailed t-test
	HaloTag_2x	HaloTag_1x_4hTm	HaloTag_2x_4hTm
HaloTag_1x	3.10758e-21	0.417467	0.000417308
HaloTag_2x		1.62678e-07	0.115156
HaloTag_1x_4hTm			0.00174361
