# Supplementary material for: Endoplasmic reticulum stress activates human IRE1α through reversible assembly of inactive dimers into small oligomers
Source: eLife. 2022 Jun 22;11:e74342. doi: 10.7554/eLife.74342 (PMC9217129; doi:10.7554/eLife.74342)
Supplement: Figure 3—figure supplement 3—source data 1. [file elife-74342-fig3-figsupp3-data1.xlsx]

## Sheet: Sheet1
Permutation test, 10000 iterations
	Halo_2x	HaloTag_4x	PWM360-NoStress	PWM360_4hTm_preLabel	PWM360_4hTm_postLabel
Halo_1x	0	0	0	0	0
Halo_2x		0	0.28744	0.00991	0.00128
HaloTag_4x			0	0	0
PWM360-NoStress				0.00077	0.00036
PWM360_4hTm_preLabel					0.38488
Two-tailed t-test
	Halo_2x	HaloTag_4x	PWM360-NoStress	PWM360_4hTm_preLabel	PWM360_4hTm_postLabel
Halo_1x	8.88653e-19	2.8389e-11	1.00517e-08	3.3595e-14	7.00503e-13
Halo_2x		9.34826e-10	0.243997	0.00783379	0.00155929
HaloTag_4x			2.15073e-10	5.22176e-09	7.87593e-09
PWM360-NoStress				0.0010434	0.000229458
PWM360_4hTm_preLabel					0.384384
