# Supplementary material for: Endoplasmic reticulum stress activates human IRE1α through reversible assembly of inactive dimers into small oligomers
Source: eLife. 2022 Jun 22;11:e74342. doi: 10.7554/eLife.74342 (PMC9217129; doi:10.7554/eLife.74342)
Supplement: Figure 3—source data 1. [file elife-74342-fig3-data1.xlsx]

## Sheet: Sheet1
Permutation test, 10000 iterations
	HaloTag_2x	HaloTag_4x	Endo_IRE1	Endo_IRE1_1hTm	Endo_IRE1_4hTm	Endo_IRE1_24hTm
HaloTag_1x	0	0	0	0	0	0
HaloTag_2x		0	0.02549	0.17614	0	0.01437
HaloTag_4x			0	0	0	0
Endo_IRE1				0.73158	0	0.55899
Endo_IRE1_1hTm					2e-05	0.42605
Endo_IRE1_4hTm						0
Two-tailed t-test
	HaloTag_2x	HaloTag_4x	Endo_IRE1	Endo_IRE1_1hTm	Endo_IRE1_4hTm	Endo_IRE1_24hTm
HaloTag_1x	1.66341e-27	5.38533e-21	4.13971e-17	2.16275e-08	1.11729e-21	7.52787e-11
HaloTag_2x		3.23837e-18	0.0243229	0.197322	5.73335e-06	0.008354
HaloTag_4x			2.60277e-19	3.19831e-20	1.18215e-16	6.44972e-20
Endo_IRE1				0.743452	9.26682e-09	0.540389
Endo_IRE1_1hTm					5.57166e-06	0.435613
Endo_IRE1_4hTm						5.95203e-09
