# Supplementary material for: Endoplasmic reticulum stress activates human IRE1α through reversible assembly of inactive dimers into small oligomers
Source: eLife. 2022 Jun 22;11:e74342. doi: 10.7554/eLife.74342 (PMC9217129; doi:10.7554/eLife.74342)
Supplement: Figure 4—figure supplement 2—source data 1. [file elife-74342-fig4-figsupp2-data1.xlsx]

## Sheet: Sheet1
Permutation test, 10000 iterations
	Halo_2x	CL-VB-69.4-NoStress	CL-VB-69.4_4h-Tm	CL-VB-69.3_NoStress	CL-VB-69.3_4h-Tm
Halo_1x	0	0	0	0	0
Halo_2x		7e-05	0	0.09662	0.18834
CL-VB-69.4-NoStress			0	0.49764	0.00053
CL-VB-69.4_4h-Tm				7e-05	0.05186
CL-VB-69.3_NoStress					0.06131
Two-tailed t-test
	Halo_2x	CL-VB-69.4-NoStress	CL-VB-69.4_4h-Tm	CL-VB-69.3_NoStress	CL-VB-69.3_4h-Tm
Halo_1x	5.6459e-29	4.62218e-25	2.97144e-16	2.1059e-05	3.1042e-06
Halo_2x		7.51322e-05	1.91045e-05	0.150574	0.298033
CL-VB-69.4-NoStress			2.03581e-09	0.549143	0.0108291
CL-VB-69.4_4h-Tm				0.000139551	0.0673138
CL-VB-69.3_NoStress					0.0663046
Note: CL-VB-69.4 is the higher-expressing clone and CL-VB-69.3 is the lower-expressing clone
