# Supplementary material for: Endoplasmic reticulum stress activates human IRE1α through reversible assembly of inactive dimers into small oligomers
Source: eLife. 2022 Jun 22;11:e74342. doi: 10.7554/eLife.74342 (PMC9217129; doi:10.7554/eLife.74342)
Supplement: Figure 4—source data 1. [file elife-74342-fig4-data1.xlsx]

## Sheet: Sheet1
Permutation test, 10000 iterations
	Halo_2x	HaloTag_4x	CL-VB-69.4-NoStress	CL-VB-69.4_2h-Tm	CL-VB-69.4_4h-Tm	CL-VB-69.4-2h-1mM-DTT	CL-VB-69.4-4h-1mM-DTT	CLVB69.4-2h-1nM-Tg	CLVB69.4-4h-1nM-Tg	CLVB69.4_10min-100nM-Tg	CL-VB-69.4-2h-100nM-Tg	CL-VB-69.4-4h-100nM-Tg	CL-VB-69.4-4h-100nMTg+Tm
Halo_1x	0	0	0	0	0	0	0	0	0	0	0	0	0
Halo_2x		0	1e-05	0.14987	0	0.07011	0.00118	0.36886	2e-05	0	0.04357	0.00629	0.09769
HaloTag_4x			0	0	0	0	0	0	0	0	0	0	0
CL-VB-69.4-NoStress				6e-05	0	5e-05	0	0.00097	0	0	0.227	0.35778	0.31945
CL-VB-69.4_2h-Tm					0.01191	0.74073	0.09637	0.77952	0.0234	0.00512	0.0115	0.0034	0.00888
CL-VB-69.4_4h-Tm						0.0491	0.67108	0.01231	0.47655	0.31873	0	0	1e-05
CL-VB-69.4-2h-1mM-DTT							0.23522	0.5924	0.06281	0.02508	0.00762	0.00178	0.01065
CL-VB-69.4-4h-1mM-DTT								0.08015	0.41473	0.25792	0.00018	4e-05	9e-05
CLVB69.4-2h-1nM-Tg									0.0298	0.00591	0.04811	0.02081	0.03011
CLVB69.4-4h-1nM-Tg										0.89548	4e-05	0	0.00016
CLVB69.4_10min-100nM-Tg											0	0	1e-05
CL-VB-69.4-2h-100nM-Tg												0.73966	0.99121
CL-VB-69.4-4h-100nM-Tg													0.76835
Two-tailed t-test
	Halo_2x	HaloTag_4x	CL-VB-69.4-NoStress	CL-VB-69.4_2h-Tm	CL-VB-69.4_4h-Tm	CL-VB-69.4-2h-1mM-DTT	CL-VB-69.4-4h-1mM-DTT	CLVB69.4-2h-1nM-Tg	CLVB69.4-4h-1nM-Tg	CLVB69.4_10min-100nM-Tg	CL-VB-69.4-2h-100nM-Tg	CL-VB-69.4-4h-100nM-Tg	CL-VB-69.4-4h-100nMTg+Tm
Halo_1x	1.74946e-34	3.1014e-11	7.14874e-32	8.65907e-09	2.26932e-18	1.07077e-07	4.18636e-07	3.18171e-06	4.08831e-07	9.90628e-09	4.41384e-11	6.58783e-16	9.24784e-10
Halo_2x		2.3316e-09	9.25677e-06	0.166734	1.36173e-06	0.132367	0.00628261	0.393575	0.00319496	0.000171393	0.0520337	0.0078206	0.0194865
HaloTag_4x			5.75529e-10	1.24259e-09	3.04042e-08	1.69497e-09	2.20785e-08	1.38302e-09	2.76559e-07	1.0194e-07	1.53623e-10	2.5865e-10	5.2816e-10
CL-VB-69.4-NoStress				0.000669948	2.36493e-11	0.0016909	0.000155462	0.00916606	0.000147741	3.86421e-06	0.263311	0.382558	0.156348
CL-VB-69.4_2h-Tm					0.012599	0.742545	0.0986159	0.781381	0.029686	0.00561701	0.0118748	0.00405013	0.00749549
CL-VB-69.4_4h-Tm						0.0679056	0.676024	0.0168338	0.540605	0.335169	1.31406e-07	2.02087e-09	2.30533e-08
CL-VB-69.4-2h-1mM-DTT							0.221871	0.581696	0.0679139	0.0227597	0.0135782	0.00625704	0.0102918
CL-VB-69.4-4h-1mM-DTT								0.0804428	0.404326	0.254375	0.000538834	0.000295101	0.000526863
CLVB69.4-2h-1nM-Tg									0.0247003	0.00620655	0.0536039	0.0282278	0.0439949
CLVB69.4-4h-1nM-Tg										0.894265	0.000412261	0.000268763	0.000417073
CLVB69.4_10min-100nM-Tg											9.95359e-06	5.41994e-06	1.21573e-05
CL-VB-69.4-2h-100nM-Tg												0.740487	0.989093
CL-VB-69.4-4h-100nM-Tg													0.683897
