# Supplementary material for: Endoplasmic reticulum stress activates human IRE1α through reversible assembly of inactive dimers into small oligomers
Source: eLife. 2022 Jun 22;11:e74342. doi: 10.7554/eLife.74342 (PMC9217129; doi:10.7554/eLife.74342)
Supplement: Figure 5—source data 1. [file elife-74342-fig5-data1.xlsx]

## Sheet: Sheet1
Permutation test, 10000 iterations
	HaloTag_2x_joint	HaloTag_4x	Endo_IRE1	Endo_IRE1_4hTm	Traffo_IRE1	Traffo_IRE1_4hTm	K121Y	K121Y_4hTm	WLLI-GSGS	WLLI-GSGS_4hTm	dKR	dKR_4hTm	dLD	dLD_4hTm	K599A	K599A_4hTm
HaloTag_1x_joint	0	0	0	0	0	0	0.01007	0.88846	0	0	0	0	0.91919	0.70984	0	0
HaloTag_2x_joint		0	0.03187	0	0.02748	0	0	0	0.20176	0.10539	0.18388	0.00018	0	0	0.3789	0
HaloTag_4x			0	0	0	0	0	0	0	0	0	0	0	0	0	0
Endo_IRE1				0	0.30491	0	0	0	0.55203	0.68885	0.56334	1e-05	0	0	0.03987	0
Endo_IRE1_4hTm					0	0.80802	0	0	0.0013	0	0.0004	0.22807	0	0	0.001	0.79322
Traffo_IRE1						0	0.00011	0	0.99751	0.65808	0.94777	0	0	0	0.01543	0
Traffo_IRE1_4hTm							0	0	0.00257	2e-05	0.00165	0.27179	0	0	0.00425	0.69351
K121Y								0.17057	0.00667	0.00034	0.00579	0	0.13656	0.09962	0	0
K121Y_4hTm									0.0002	3e-05	0.00037	0	0.97587	0.71281	0	0
WLLI-GSGS										0.78511	0.95139	0.01224	4e-05	3e-05	0.10575	0.00209
WLLI-GSGS_4hTm											0.80996	0.00042	1e-05	0.00012	0.10081	2e-05
dKR												0.00773	7e-05	0.0001	0.11508	0.00153
dKR_4hTm													0	0	0.06098	0.46291
dLD														0.68196	0	0
dLD_4hTm															0	0
K599A																0.00812
Two-tailed t-test
	HaloTag_2x_joint	HaloTag_4x	Endo_IRE1	Endo_IRE1_4hTm	Traffo_IRE1	Traffo_IRE1_4hTm	K121Y	K121Y_4hTm	WLLI-GSGS	WLLI-GSGS_4hTm	dKR	dKR_4hTm	dLD	dLD_4hTm	K599A	K599A_4hTm
HaloTag_1x_joint	6.73785e-49	1.77656e-20	3.8861e-39	2.45018e-48	4.04768e-10	1.1428e-12	0.0432772	0.904168	7.44504e-07	8.73796e-08	0.000706216	4.58487e-11	0.917938	0.640857	1.85641e-09	3.5597e-12
HaloTag_2x_joint		1.05895e-17	0.0316572	2.74877e-13	0.0109541	6.79627e-05	2.99059e-08	1.12114e-08	0.00695176	0.162118	0.170376	0.00388124	6.32959e-11	1.07146e-09	0.40953	0.000190083
HaloTag_4x			3.36793e-18	1.05185e-15	7.50612e-20	1.05028e-15	1.36935e-22	4.35246e-23	7.22866e-19	1.10246e-20	2.54691e-16	5.23098e-17	1.43931e-22	3.01013e-22	6.80549e-19	3.5845e-16
Endo_IRE1				9.0022e-18	0.244219	4.59731e-06	1.24732e-06	1.50464e-07	0.184578	0.735226	0.550878	0.000315404	1.52062e-09	1.02207e-08	0.0657835	1.2528e-05
Endo_IRE1_4hTm					3.53214e-12	0.817294	4.397e-16	1.20522e-14	1.81879e-10	1.30104e-07	0.000151737	0.236734	5.96003e-19	1.49867e-16	0.000308867	0.788047
Traffo_IRE1						1.17606e-06	0.000144655	3.23457e-06	0.996418	0.644994	0.951374	8.62471e-05	1.64264e-07	9.70704e-08	0.0187969	3.20158e-06
Traffo_IRE1_4hTm							6.04003e-11	4.1039e-12	1.06279e-06	2.12812e-05	0.00017816	0.268026	8.88281e-13	7.42114e-13	0.00315786	0.693633
K121Y								0.1628	0.000105926	0.000292899	0.0087454	4.64463e-09	0.114804	0.0495739	8.94457e-07	1.51359e-10
K121Y_4hTm									4.05635e-06	6.82765e-06	0.000853909	2.34726e-10	0.976477	0.684541	3.18397e-08	1.0912e-11
WLLI-GSGS										0.622901	0.94734	6.71882e-05	4.23792e-07	4.89044e-07	0.0143318	2.88833e-06
WLLI-GSGS_4hTm											0.777056	0.000994033	1.17362e-06	4.25909e-07	0.0938335	5.89924e-05
dKR												0.00266444	0.000679406	0.000402448	0.0938348	0.000410034
dKR_4hTm													5.38172e-11	3.68163e-11	0.0606416	0.456647
dLD														0.669143	4.95937e-09	2.25453e-12
dLD_4hTm															2.99529e-09	2.04823e-12
K599A																0.00795816
